# Supplementary material for: Arbuscular Mycorrhizal Fungal Communities of Native Plant Species under High Petroleum Hydrocarbon Contamination Highlights Rhizophagus as a Key Tolerant Genus
Source: PubMed Central journal article supplement (PMC7356029; doi:10.3390/microorganisms8060872), 2020-06-09
Supplement: microorganisms-08-00872-s001.pdf [file microorganisms-08-00872-s001.pdf]

## Supplementary material

**Table S1.** The concentration of different petroleum hydrocarbon pollutants recorded in the three sampled basins compared with the reference values set by Quebec Government.

| Petroleum hydrocarbon                  | Concentration recorded in the different basins $\mu\text{g}/\text{kg}$ |       |       | Threshold values set by the Quebec Government (ccme.ca) |            |            |
|----------------------------------------|------------------------------------------------------------------------|-------|-------|---------------------------------------------------------|------------|------------|
|                                        | LC <sub>1</sub>                                                        | MC    | HC    | Residential                                             | Commercial | Industrial |
| Phenanthrene                           | 1                                                                      | 2700  | 4300  | 0.1                                                     | 5          | 50         |
| Acenaphrene                            | 0.2                                                                    | 760   | 620   | 0.1                                                     | 10         | 100        |
| Anthracene                             | 6.7                                                                    | 340   | 570   | 0.1                                                     | 10         | 100        |
| Fluorene                               | 0.3                                                                    | 710   | 630   | 0.1                                                     | 10         | 100        |
| 1-methylnaphtalene                     | 0.1                                                                    | 320   | 300   | 0.1                                                     | 1          | 10         |
| 1,3-Dimethylnaphtalene                 | 0.1                                                                    | 390   | 580   | 0.1                                                     | 1          | 10         |
| Total petroleum hydrocarbons (C10-C50) | 3000                                                                   | 41000 | 91000 | 300                                                     | 700        | 3500       |

<sup>1</sup> Low concentration (LC), moderate concentration (MC) and high concentration (HC).

**Table S2.** Identification of OTUs. BLAST results (using NCBI and MAARJAM database) of the 36 OTUs are given below. OTUs represented by two or less than two sequences (marked as red color) were not used for future analysis.

| OTUs  | Identification                            | Orders         | Families             | Genera                 | Accessing code | Similarity |
|-------|-------------------------------------------|----------------|----------------------|------------------------|----------------|------------|
| OTU01 | <i>Rhizopagus irregulare</i><br>VTX00114  | Glomerale      | Glomeraceae          | <i>Rhizopagus</i>      | FN600536.1     | 100%       |
| OTU02 | <i>Claroideoglomus</i> sp. VTX00193       | Glomerale      | Claroideoglomeraceae | <i>Claroideoglomus</i> | KJ809525.1     | 100%       |
| OTU03 | <i>Acaulospora</i> sp. VTX00028           | Diversisporale | Acaulosporaceae      | <i>Acaulospora</i>     | EU332727.1     | 99%        |
| OTU04 | <i>Rhizopagus</i> sp. VTX00113            | Glomerale      | Glomeraceae          | <i>Rhizopagus</i>      | JX144124.1     | 99%        |
| OTU05 | <i>Diversispora eburnea</i> VTX00060      | Diversisporale | Diversisporaceae     | <i>Diversispora</i>    | AM713429.1     | 100%       |
| OTU06 | <i>Claroideoglomus</i> sp. VTX00276       | Glomerale      | Claroideoglomeraceae | <i>Claroideoglomus</i> | AB749515.1     | 99%        |
| OTU07 | <i>Paraglomus</i> sp. VTX00350            | Paraglomerale  | Paraglomeraceae      | <i>Paraglomus</i>      | HE576915.1     | 91%        |
| OTU08 | <i>Funnelformis mosseae</i><br>VTX00067   | Glomerale      | Glomeraceae          | <i>Funnelformis</i>    | JX461236.1     | 98%        |
| OTU09 | <i>Diversispora celata</i> VTX00060       | Diversisporale | Diversisporaceae     | <i>Diversispora</i>    | AM713423.1     | 96%        |
| OTU10 | <i>Rhizopagus</i> sp. VTX00114            | Glomerale      | Glomeraceae          | <i>Rhizopagus</i>      | KC708370       | 98%        |
| OTU11 | Glomeraceae sp. VTX00327                  | Glomerale      | Glomeraceae          | -                      | JF414193       | 94%        |
| OTU12 | <i>Claroideoglomus</i> sp. VTX00193       | Glomerale      | Claroideoglomeraceae | <i>Claroideoglomus</i> | KJ809525.1     | 95%        |
| OTU13 | Glomeraceae sp. VTX00069                  | Glomerale      | Glomeraceae          | -                      | GU353706.1     | 96%        |
| OTU14 | Glomeraceae sp. VTX00130                  | Glomerale      | Glomeraceae          | -                      | AB698566.1     | 99%        |
| OTU15 | <i>Claroideoglomus</i> sp. VTX00193       | Glomerale      | Claroideoglomeraceae | <i>Claroideoglomus</i> | KJ809525.1     | 97%        |
| OTU16 | <i>Rhizopagus irregulare</i><br>VTX00114  | Glomerale      | Glomeraceae          | <i>Rhizopagus</i>      | FN600538.1     | 97%        |
| OTU17 | <i>Claroideoglomus</i> sp. VTX00193       | Glomerale      | Claroideoglomeraceae | <i>Claroideoglomus</i> | KJ809525.1     | 97%        |
| OTU18 | <i>Claroideoglomus</i> sp. VTX00193       | Glomerale      | Claroideoglomeraceae | <i>Claroideoglomus</i> | KJ809525.1     | 95%        |
| OTU19 | <i>Rhizopagus</i> sp. VTX00113            | Glomerale      | Glomeraceae          | <i>Rhizopagus</i>      | HG004504.1     | 96%        |
| OTU20 | <i>Rhizopagus</i> sp. VTX00113            | Glomerale      | Glomeraceae          | <i>Rhizopagus</i>      | HG004476.1     | 97%        |
| OTU21 | <i>Rhizopagus irregulare</i><br>VTX00114  | Glomerale      | Glomeraceae          | <i>Rhizopagus</i>      | JX144120.1     | 97%        |
| OTU22 | <i>Claroideoglomus</i> sp. VTX00193       | Glomerale      | Claroideoglomeraceae | <i>Claroideoglomus</i> | HQ258987.1     | 96%        |
| OTU23 | <i>Claroideoglomus</i> sp. VTX00193       | Glomerale      | Claroideoglomeraceae | <i>Claroideoglomus</i> | KJ809525.1     | 98%        |
| OTU24 | <i>Rhizopagus</i> sp. VTX00113            | Glomerale      | Glomeraceae          | <i>Rhizopagus</i>      | HG004521.1     | 99%        |
| OTU25 | <i>Claroideoglomus</i> sp. VTX00057       | Glomerale      | Claroideoglomeraceae | <i>Claroideoglomus</i> | KC708358.1     | 97%        |
| OTU26 | <i>Rhizopagus</i> sp. VTX00113            | Glomerale      | Glomeraceae          | <i>Rhizopagus</i>      | EU332711.1     | 96%        |
| OTU27 | <i>Claroideoglomus</i> sp. VTX00193       | Glomerale      | Claroideoglomeraceae | <i>Claroideoglomus</i> | KJ809525.1     | 98%        |
| OTU28 | <i>Claroideoglomus</i> sp. VTX00193       | Glomerale      | Claroideoglomeraceae | <i>Claroideoglomus</i> | HE615035.1     | 95%        |
| OTU29 | Glomeraceae <i>Glomus</i> sp.<br>VTX00114 | Glomerale      | Glomeraceae          | <i>Rhizopagus</i>      | KC708370.1     | 99%        |
| OTU30 | <i>Claroideoglomus</i> sp. VTX00193       | Glomerale      | Claroideoglomeraceae | <i>Claroideoglomus</i> | HE614983.1     | 97%        |
| OTU31 | <i>Paraglomus</i> sp. VTX00001            | Paraglomerale  | Paraglomeraceae      | <i>Paraglomus</i>      | KF386326.1     | 89%        |
| OTU32 | <i>Rhizopagus irregulare</i><br>VTX00114  | Glomerale      | Glomeraceae          | <i>Rhizopagus</i>      | KC708370.1     | 99%        |
| OTU33 | Glomeraceae sp. VTX00166                  | Glomerale      | Glomeraceae          | -                      | FR693470.1     | 98%        |
| OTU34 | <i>Rhizopagus irregulare</i><br>VTX00114  | Glomerale      | Glomeraceae          | <i>Rhizopagus</i>      | KC708370.1     | 97%        |
| OTU35 | <i>Rhizopagus</i> sp. VTX00113            | Glomerale      | Glomeraceae          | <i>Rhizopagus</i>      | JX144125.1     | 96%        |
| OTU36 | <i>Acaulospora</i> sp. VTX00028           | Diversisporale | Acaulosporaceae      | <i>Acaulospora</i>     | EU332732.1     | 97%        |

**Figure S1**

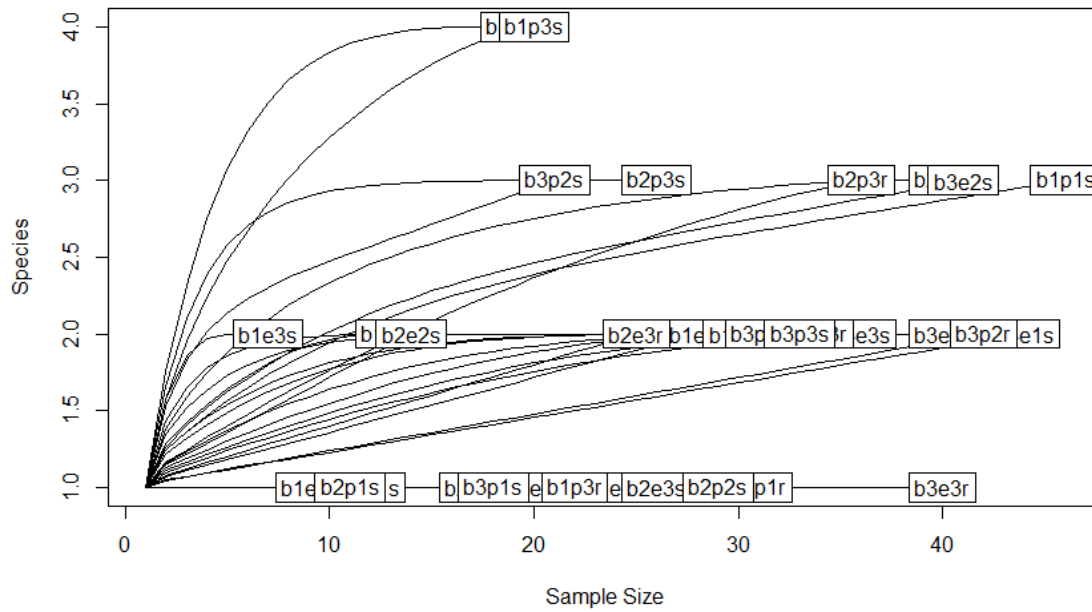

**Figure S1.** Rarefaction curves of each sample showing the saturation of OTUs richness of *Glomeromycota* associated with *P. tremuloides* and *E. elliptica* from low, moderate and high contamination basins. Rarefaction analysis was based on taxonomic assignment at 97% of sequence similarity.

Figure S2

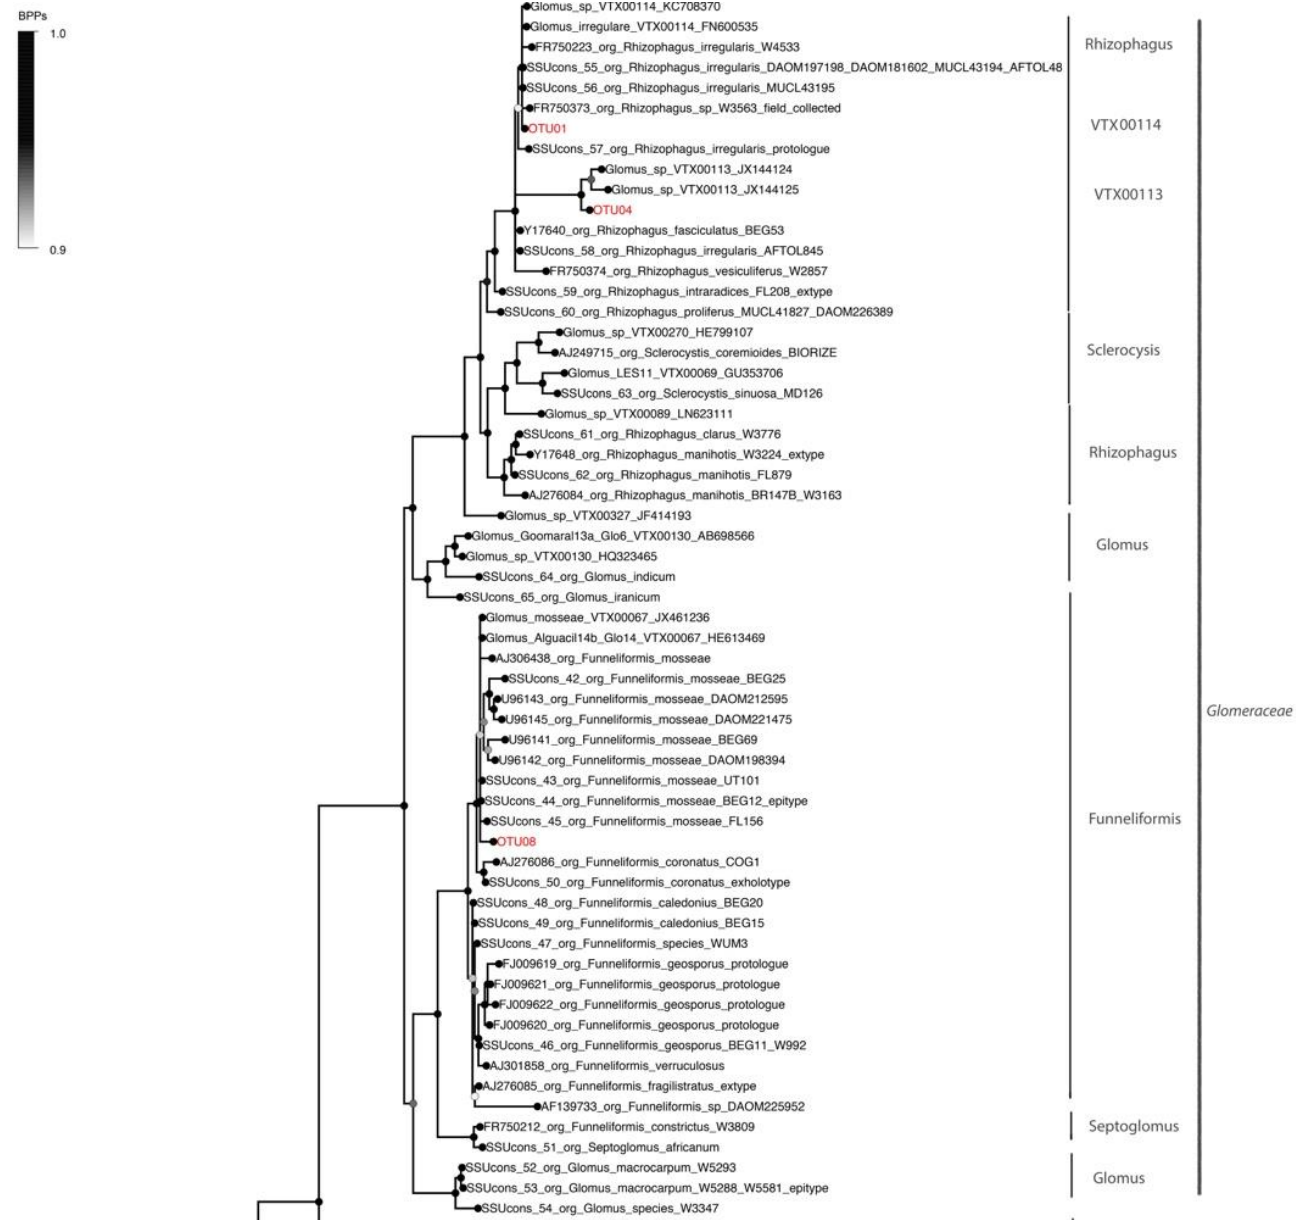

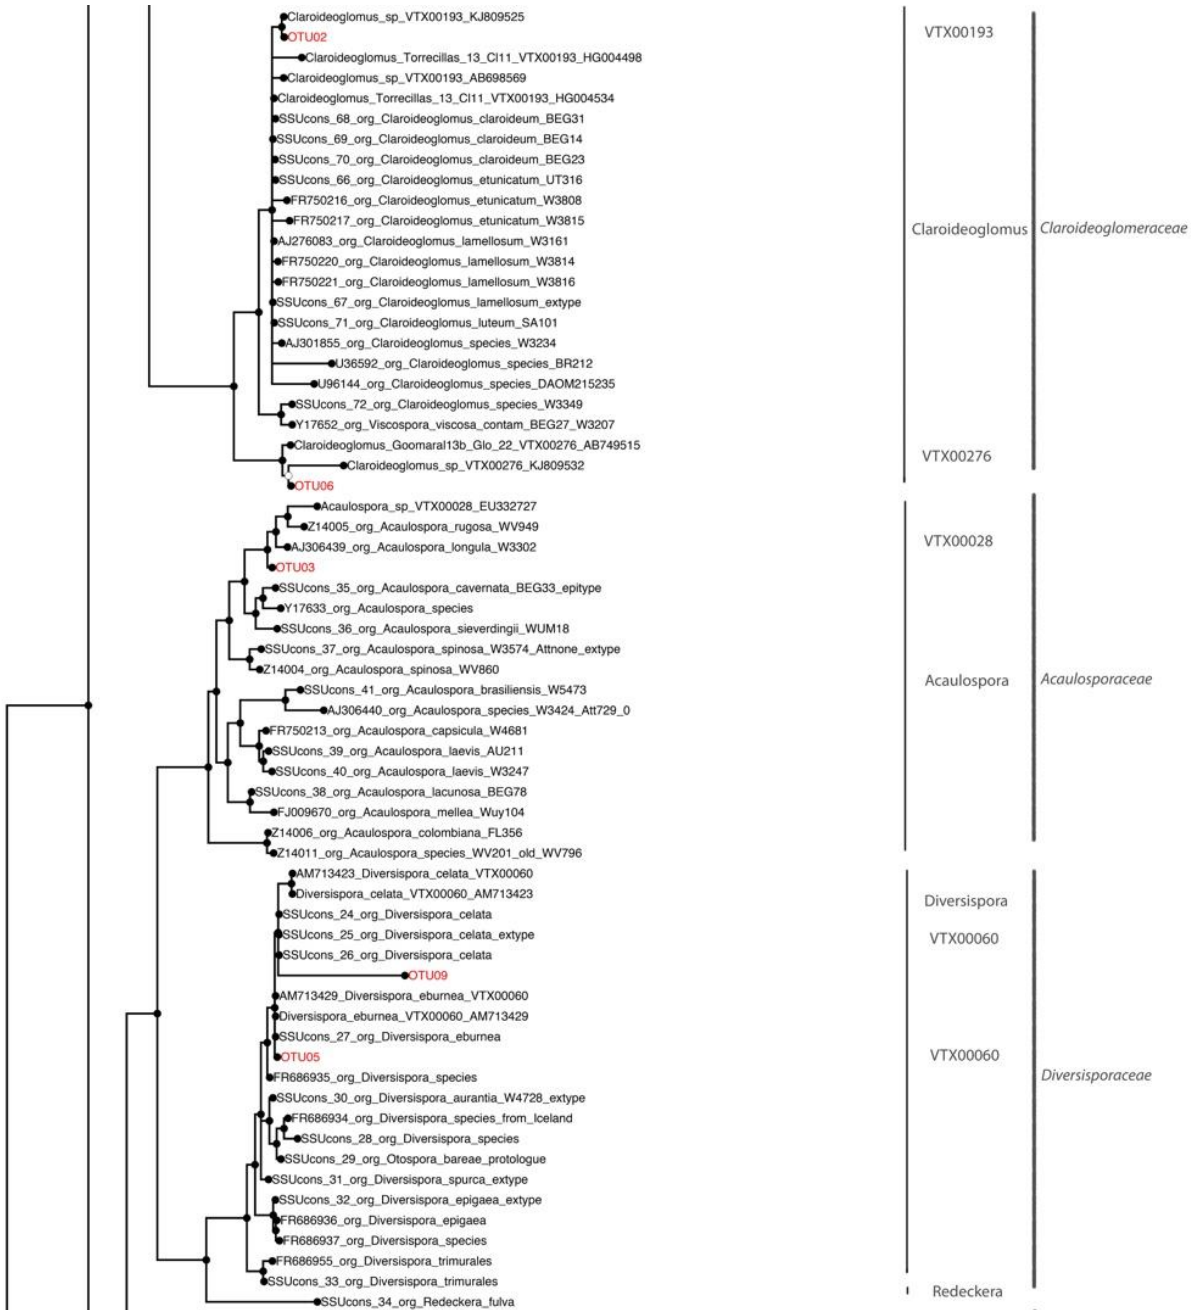

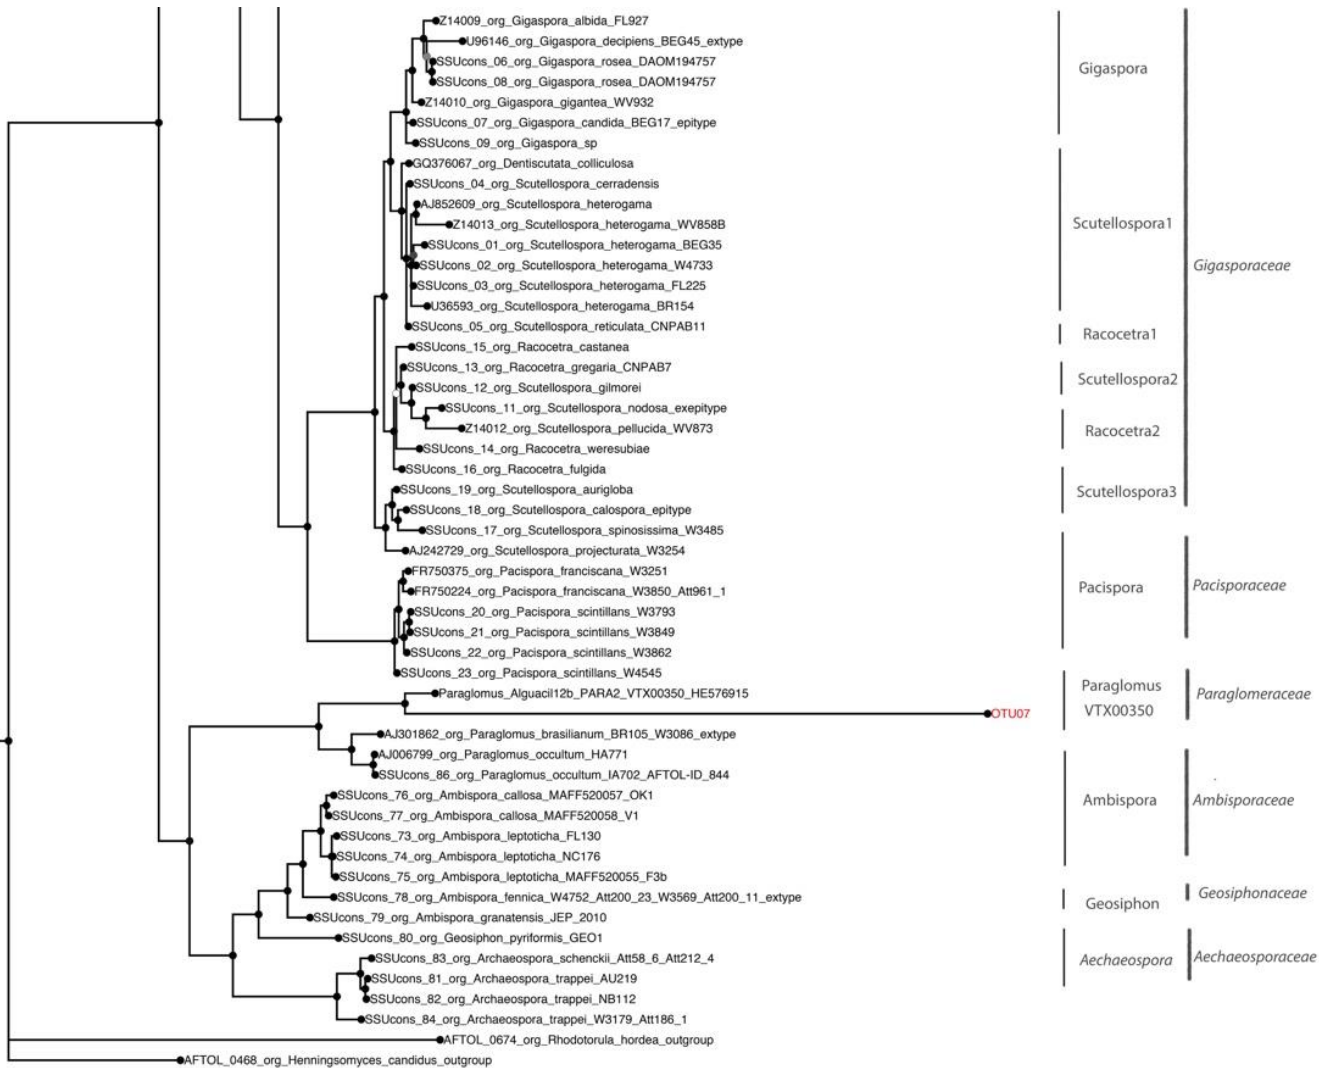

**Figure S2.** Bayesian phylogenetic tree based on nuclear small subunit (SSU) rDNA consensus sequences showing the distribution of the 9 OTUs recorded in contaminated sites (red labels) among the Glomeromycota phylogenetic tree. Sequence dataset was analyzed with the SSU sequences of the 9 OTUs (red labels) from Krüger et al. (2012) and the closest match recovered from MaarjAM database. Circles on nodes indicate Bayesian posterior probabilities ranging from 0.9 (white) to 1 (black). The scale represents the branch length corresponding to expected substitutions per site.
